# Supplementary material for: Graphene oxide/cellulose composite films with enhanced UV-shielding and mechanical properties prepared in NaOH/urea aqueous solution
Source: Royal Society of Chemistry journal article supplement (doi:10.1039/c6ra16535d), 2016-01-01
Supplement: c6ra16535d1.pdf [file c6ra16535d1.pdf]

## Supplementary Information

### Graphene oxide/Cellulose composite films with enhanced UV-shielding and mechanical properties prepared in NaOH/urea aqueous solution

Xiaoting Liu, Tongping Zhang, Kai Pang, Yongxin Duan\* and Jianming Zhang\*

*Key Laboratory of Rubber-Plastics, Ministry of Education/*

*Shandong Provincial Key Laboratory of Rubber-plastics, Qingdao University of Science & Technology, Qingdao City 266042, People's Republic of China.*

\*Corresponding authors. E-mail: [zjm@qust.edu.cn](mailto:zjm@qust.edu.cn); [dyx@qust.edu.cn](mailto:dyx@qust.edu.cn)

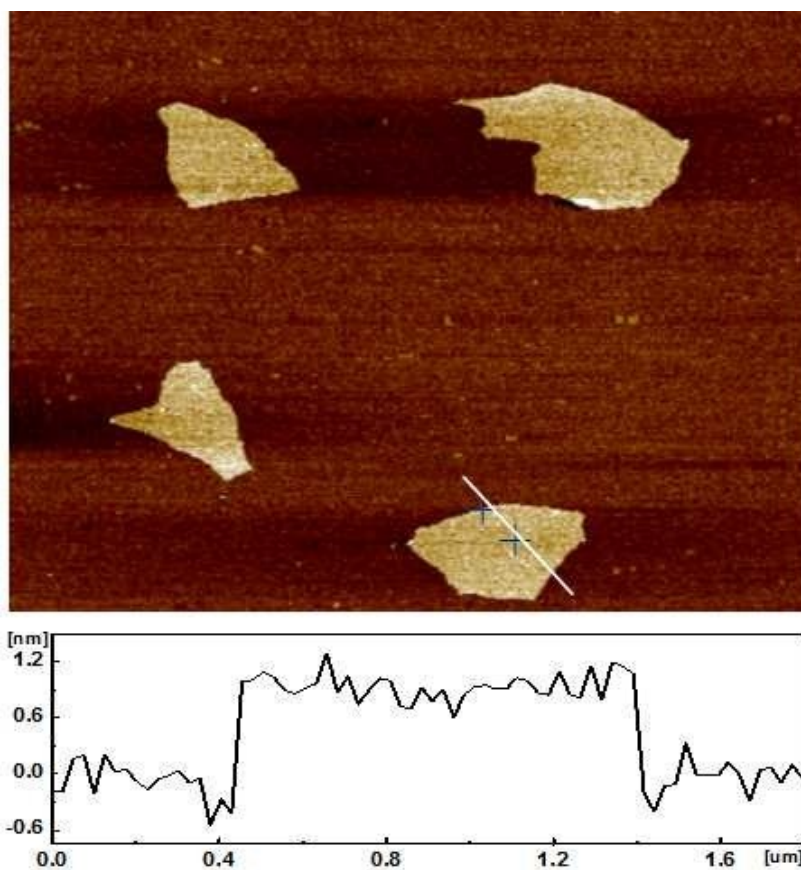

Fig. S1 A typical AFM image of GO sheets deposited onto a mica substrate from an aqueous dispersion.
